# Supplementary material for: Towards Web-based representation and processing of health information
Source: PubMed Central journal article supplement (PMC2651125; doi:10.1186/1476-072x-8-3), 2009-01-21
Supplement: 1476-072X-8-3-S1.pdf [file 1476-072X-8-3-S1.pdf]

```

1  <?xml version="1.0" encoding="UTF-8"?>
2  <!--
3  By Sheng Gao, April 2008
4
5  Submitted as additional material for the IJHG article
6
7  This document is our preliminary HERXML schema, designed using Altova XMLSpy. This XML schema covers the semantic, geometric and graphic representations
  of health information.
8  -->
9
10 <xs:schema xmlns:herxml="http://nblung.ca" xmlns:xs="http://www.w3.org/2001/XMLSchema" xmlns:gml="http://www.opengis.net/gml" xmlns:xlink="
  http://www.w3.org/1999/xlink" targetNamespace="http://nblung.ca" elementFormDefault="qualified" attributeFormDefault="unqualified">
11   <xs:import namespace="http://www.opengis.net/gml" schemaLocation="schema/gml/3.1.1/base/feature.xsd"/>
12   <xs:element name="HERXML">
13     <xs:annotation>
14       <xs:documentation>herxml schema root element</xs:documentation>
15     </xs:annotation>
16     <xs:complexType>
17       <xs:sequence>
18         <xs:element name="Health" type="herxml:HealthType"/>
19         <xs:element name="MappingData">
20           <xs:complexType>
21             <xs:sequence>
22               <xs:element ref="herxml:BoundingBox"/>
23               <xs:element name="SpatialData">
24                 <xs:complexType>
25                   <xs:sequence>
26                     <xs:element ref="herxml:DataSource"/>
27                     <xs:choice>
28                       <xs:element name="WFS">
29                         <xs:complexType>
30                           <xs:sequence>
31                             <xs:element name="URL"/>
32                             <xs:element name="LayerName"/>
33                           </xs:sequence>
34                           <xs:attribute name="version"/>
35                         </xs:complexType>
36                       </xs:element>
37                       <xs:element name="Geometries">
38                         <xs:complexType>
39                           <xs:sequence>
40                             <xs:element name="Geometry" type="gml:AbstractGeometricPrimitiveType" maxOccurs="unbounded"/>
41                           </xs:sequence>
42                         </xs:complexType>
43                       </xs:element>
44                       <xs:element name="RemoteLink">
45                         <xs:complexType>
46                           <xs:attribute name="type" form="unqualified"/>
47                           <xs:attribute name="href"/>
48                         </xs:complexType>
49                       </xs:element>
50                     </xs:choice>
51                   </xs:sequence>
52                 </xs:complexType>
53               </xs:element>
54               <xs:element name="Relation">
55                 <xs:complexType>
56                   <xs:sequence>
57                     <xs:element name="JoinAttribute" type="xs:string"/>
58                     <xs:element name="MatchingValuePairs" maxOccurs="unbounded">
59                       <xs:complexType>
60                         <xs:sequence>
61                           <xs:element name="SpatialIDValue" type="xs:string"/>
62                           <xs:element name="HealthIDValue" type="xs:string"/>
63                         </xs:sequence>
64                       </xs:complexType>
65                     </xs:element>
66                   </xs:sequence>
67                 </xs:complexType>
68               </xs:element>
69               <xs:element name="MappingValues">
70                 <xs:complexType>
71                   <xs:sequence>
72                     <xs:element name="StatisticalMethod">
73                       <xs:complexType>
74                         <xs:sequence>

```

```

75         <xs:element ref="herxml:Name"/>
76         <xs:element ref="herxml:Title"/>
77         <xs:element ref="herxml:Description"/>
78         <xs:element name="ParameterGroup" maxOccurs="unbounded">
79             <xs:complexType>
80                 <xs:sequence>
81                     <xs:element ref="herxml:parameter" maxOccurs="unbounded"/>
82                 </xs:sequence>
83             </xs:complexType>
84         </xs:element>
85     </xs:sequence>
86 </xs:complexType>
87 </xs:element>
88 <xs:element ref="herxml:DataSource"/>
89 <xs:element name="MappingValueGroup" maxOccurs="unbounded">
90     <xs:complexType>
91         <xs:sequence>
92             <xs:element name="MappingValue" maxOccurs="unbounded">
93                 <xs:complexType>
94                     <xs:simpleContent>
95                         <xs:extension base="xs:double">
96                             <xs:attribute name="healthIDValue"/>
97                         </xs:extension>
98                     </xs:simpleContent>
99                 </xs:complexType>
100             </xs:element>
101         </xs:sequence>
102         <xs:attribute name="groupAttr"/>
103     </xs:complexType>
104 </xs:element>
105 </xs:sequence>
106 <xs:attribute name="attrName"/>
107 </xs:complexType>
108 </xs:element>
109 </xs:sequence>
110 </xs:complexType>
111 </xs:element>
112 <xs:element name="Representation">
113     <xs:complexType>
114         <xs:sequence>
115             <xs:element ref="herxml:BoundingBox"/>
116             <xs:element ref="herxml:Style"/>
117         </xs:sequence>
118     </xs:complexType>
119 </xs:element>
120 </xs:sequence>
121 <xs:attribute name="version" use="required"/>
122 </xs:complexType>
123 </xs:element>
124 <xs:element name="Name" type="xs:string"/>
125 <xs:element name="Title" type="xs:string"/>
126 <xs:element name="Description" type="xs:string"/>
127 <xs:element name="KeywordList">
128     <xs:complexType>
129         <xs:sequence>
130             <xs:element name="Keyword" type="xs:string" maxOccurs="unbounded"/>
131         </xs:sequence>
132     </xs:complexType>
133 </xs:element>
134 <xs:element name="BoundingBox" type="herxml:BoundingBoxType"/>
135 <xs:complexType name="BoundingBoxType">
136     <xs:sequence>
137         <xs:element name="Minx" type="xs:double"/>
138         <xs:element name="MinY" type="xs:double"/>
139         <xs:element name="MaxX" type="xs:double"/>
140         <xs:element name="MaxY" type="xs:double"/>
141     </xs:sequence>
142     <xs:attribute name="srsName" type="xs:string" use="required"/>
143 </xs:complexType>
144 <xs:element name="parameter" type="xs:string" abstract="true">
145     <xs:annotation>
146         <xs:documentation>abstract parameter element, used for the definition of health influential factors</xs:documentation>
147     </xs:annotation>
148 </xs:element>
149 <xs:element name="Geolayer" type="xs:string" substitutionGroup="herxml:parameter"/>
150 <xs:element name="AgeFrom" type="xs:string" substitutionGroup="herxml:parameter"/>

```

```

151 <xs:element name="AgeTo" type="xs:string" substitutionGroup="herxml:parameter"/>
152 <xs:element name="StartTime" type="xs:string" substitutionGroup="herxml:parameter"/>
153 <xs:element name="EndTime" type="xs:string" substitutionGroup="herxml:parameter"/>
154 <xs:element name="Gender" type="xs:string" substitutionGroup="herxml:parameter"/>
155 <xs:complexType name="StyleType">
156   <xs:annotation>
157     <xs:documentation>abstract representation style, used for the defintion of PointStyleType, ChartStyleType, LineStyleType, and PolygonStyleType</
xs:documentation>
158   </xs:annotation>
159   <xs:sequence>
160     <xs:element ref="herxml:Name" minOccurs="0"/>
161     <xs:element ref="herxml:Title" minOccurs="0"/>
162     <xs:element ref="herxml:Description" minOccurs="0"/>
163   </xs:sequence>
164 </xs:complexType>
165 <xs:element name="Style" type="herxml:StyleType" abstract="true"/>
166 <xs:element name="PointStyle" type="herxml:PointStyleType" substitutionGroup="herxml:Style"/>
167 <xs:element name="ChartStyle" type="herxml:ChartStyleType" substitutionGroup="herxml:Style"/>
168 <xs:element name="LineStyle" type="herxml:LineStyleType" substitutionGroup="herxml:Style"/>
169 <xs:element name="PolygonStyle" type="herxml:PolygonStyleType" substitutionGroup="herxml:Style"/>
170 <xs:complexType name="PointStyleType">
171   <xs:complexContent>
172     <xs:extension base="herxml:StyleType">
173       <xs:sequence>
174         <xs:element name="PointSize" type="xs:double"/>
175         <xs:choice>
176           <xs:element ref="herxml:Color"/>
177           <xs:element name="Symbol">
178             <xs:complexType>
179               <xs:sequence>
180                 <xs:element ref="herxml:Name"/>
181                 <xs:element name="URL" type="xs:string"/>
182               </xs:sequence>
183             </xs:complexType>
184           </xs:element>
185         </xs:choice>
186       </xs:sequence>
187     </xs:extension>
188   </xs:complexContent>
189 </xs:complexType>
190 <xs:complexType name="LineStyleType">
191   <xs:complexContent>
192     <xs:extension base="herxml:StyleType">
193       <xs:sequence>
194         <xs:element ref="herxml:Color"/>
195         <xs:element name="LineWeight" type="xs:double"/>
196         <xs:element name="LineStyle" type="xs:string"/>
197       </xs:sequence>
198     </xs:extension>
199   </xs:complexContent>
200 </xs:complexType>
201 <xs:complexType name="ChartStyleType">
202   <xs:complexContent>
203     <xs:extension base="herxml:StyleType">
204       <xs:sequence>
205         <xs:element name="ChartMethod" type="xs:string"/>
206         <xs:element name="ChartSize" type="xs:double"/>
207         <xs:element name="ChartVariation" type="xs:boolean"/>
208         <xs:element name="ChartColorScheme" maxOccurs="unbounded">
209           <xs:complexType>
210             <xs:sequence>
211               <xs:element name="ChartField" type="xs:string"/>
212               <xs:element ref="herxml:Color"/>
213             </xs:sequence>
214           </xs:complexType>
215         </xs:element>
216       </xs:sequence>
217     </xs:extension>
218   </xs:complexContent>
219 </xs:complexType>
220 <xs:complexType name="PolygonStyleType">
221   <xs:complexContent>
222     <xs:extension base="herxml:StyleType">
223       <xs:sequence>
224         <xs:element ref="herxml:Fill"/>
225         <xs:element name="Border" type="herxml:LineStyleType"/>

```

```

226     </xs:sequence>
227   </xs:extension>
228 </xs:complexContent>
229 </xs:complexType>
230 <xs:complexType name="FillType">
231   <xs:sequence>
232     <xs:element ref="herxml:Description" minOccurs="0"/>
233   </xs:sequence>
234 </xs:complexType>
235 <xs:element name="Fill" type="herxml:FillType"/>
236 <xs:element name="RangeFill" type="herxml:RangeFillType" substitutionGroup="herxml:Fill"/>
237 <xs:element name="GradientFill" type="herxml:GradientFillType" substitutionGroup="herxml:Fill"/>
238 <xs:complexType name="GradientFillType">
239   <xs:complexContent>
240     <xs:extension base="herxml:FillType">
241       <xs:sequence>
242         <xs:element name="FromColor" type="xs:string"/>
243         <xs:element name="ToColor" type="xs:string"/>
244         <xs:element name="NumOfClasses" type="xs:int"/>
245       </xs:sequence>
246     </xs:extension>
247   </xs:complexContent>
248 </xs:complexType>
249 <xs:complexType name="RangeFillType">
250   <xs:complexContent>
251     <xs:extension base="herxml:FillType">
252       <xs:choice>
253         <xs:element name="SingleRange" maxOccurs="unbounded">
254           <xs:complexType>
255             <xs:sequence>
256               <xs:element name="RangeValue" type="xs:double"/>
257               <xs:element ref="herxml:FillMethod"/>
258             </xs:sequence>
259           </xs:complexType>
260         </xs:element>
261         <xs:element name="DoubleRange" maxOccurs="unbounded">
262           <xs:complexType>
263             <xs:sequence>
264               <xs:element name="MinValue" type="xs:double"/>
265               <xs:element name="MaxValue" type="xs:double"/>
266               <xs:element ref="herxml:FillMethod"/>
267             </xs:sequence>
268           </xs:complexType>
269         </xs:element>
270       </xs:choice>
271     </xs:extension>
272   </xs:complexContent>
273 </xs:complexType>
274 <xs:element name="Color" type="xs:string">
275   <xs:annotation>
276     <xs:documentation>e.g., 0x#####</xs:documentation>
277   </xs:annotation>
278 </xs:element>
279 <xs:element name="Texure"/>
280 <xs:element name="Pattern"/>
281 <xs:complexType name="FillMethodType">
282   <xs:choice>
283     <xs:element ref="herxml:Color"/>
284     <xs:element ref="herxml:Texure"/>
285     <xs:element ref="herxml:Pattern"/>
286   </xs:choice>
287 </xs:complexType>
288 <xs:element name="FillMethod" type="herxml:FillMethodType"/>
289 <xs:complexType name="DataSourceType">
290   <xs:sequence>
291     <xs:element name="Contact">
292       <xs:complexType>
293         <xs:sequence>
294           <xs:element name="ContactName" type="xs:string"/>
295           <xs:element name="Address" type="xs:string"/>
296           <xs:element name="Phone" type="xs:string"/>
297         </xs:sequence>
298       </xs:complexType>
299     </xs:element>
300     <xs:element name="DataSourceDescription" type="xs:string"/>
301     <xs:element name="DataSourceTime" type="xs:string"/>

```

```
302 </xs:sequence>
303 </xs:complexType>
304 <xs:element name="DataSource" type="herxml:DataSourceType"/>
305 <xs:complexType name="HealthType" abstract="true">
306 <xs:sequence>
307 <xs:element ref="herxml:Name"/>
308 <xs:element ref="herxml:Title"/>
309 <xs:element ref="herxml:Description"/>
310 <xs:element ref="herxml:KeywordList" minOccurs="0"/>
311 </xs:sequence>
312 <xs:attribute name="type" type="xs:string" use="optional"/>
313 </xs:complexType>
314 <xs:complexType name="DiseaseObservationType">
315 <xs:complexContent>
316 <xs:extension base="herxml:HealthType">
317 <xs:sequence>
318 <xs:element name="Code" type="xs:string"/>
319 </xs:sequence>
320 </xs:extension>
321 </xs:complexContent>
322 </xs:complexType>
323 </xs:schema>
324
```
